# Supplementary material
Source: PubMed Central journal article supplement (PMC554808)

PLOT

47.0749, 127.905

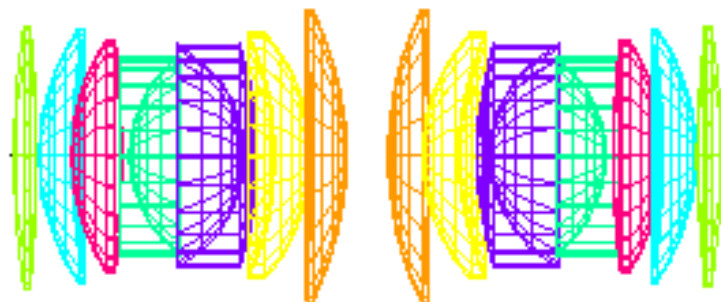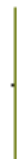

Y  
Z  
-47.0749, -.357 millimeters

ASAP Prd v6.6

2001-11-13 17:51

Supplement: pnas_102_11_4158__4.pdf [file pnas_102_11_4158__4.pdf]

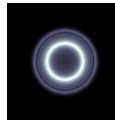

$-600 \mu\text{m}$

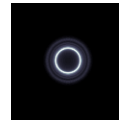

$-450 \mu\text{m}$

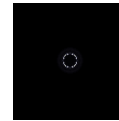

$-300 \mu\text{m}$

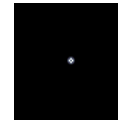

$-150 \mu\text{m}$

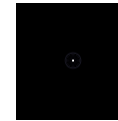

$0 \mu\text{m}$

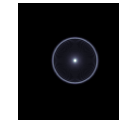

$+150 \mu\text{m}$

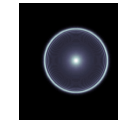

$+300 \mu\text{m}$

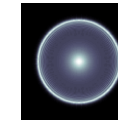

$+450 \mu\text{m}$

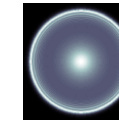

$+600 \mu\text{m}$

Supplement: pnas_102_11_4158__5.pdf [file pnas_102_11_4158__5.pdf]

**a**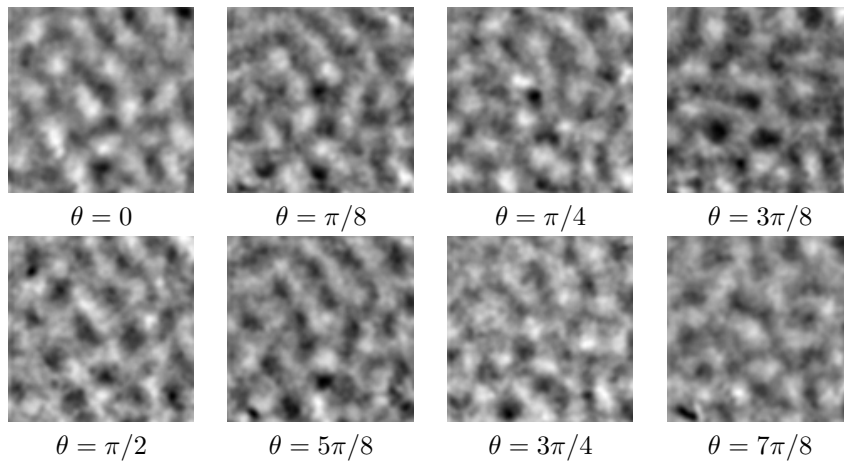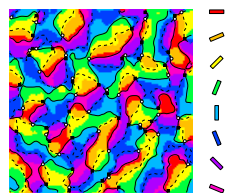

orientation tuning map

**b**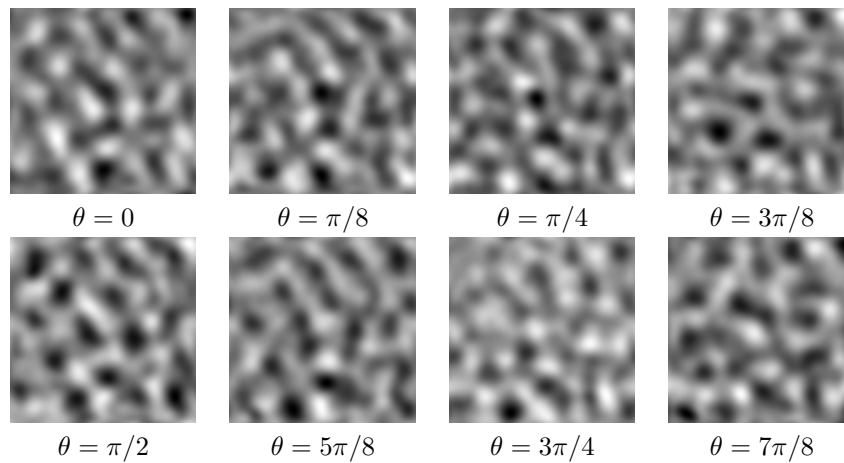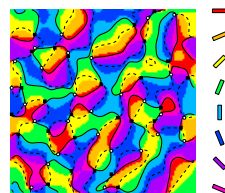

orientation tuning map

Supplement: pnas_102_11_4158__7.pdf [file pnas_102_11_4158__7.pdf]
